# Supplementary material for: Extreme Heat and Wildfire Emissions Enhance Volatile Organic Compounds: Insights on Future Climate
Source: Copernicus journal article supplement (doi:10.5194/egusphere-2024-1808), 2024-06-27
Supplement: Supplementary file 1 [file egusphere-2024-1808-supplement.pdf]

## Supporting Information

### **Extreme Heat and Wildfire Emissions Enhance Volatile Organic Compounds: Insights on Future Climate**

Salvador, C.M.<sup>1</sup>, Wood, J.<sup>2</sup>, Cochran, E.<sup>2</sup>, Seubert, H.<sup>2</sup>, Kamplain, B.<sup>2</sup>, Overby, S.<sup>2</sup>, Birdwell, K.<sup>1</sup>, Gu, L.<sup>1</sup>, Mayes, M.A.<sup>1</sup>

<sup>1</sup>*Environmental Sciences Division, Oak Ridge National Laboratory, Oak Ridge, TN, USA*

<sup>2</sup>*School of Natural Resources, University of Missouri, Columbia, MO, USA*

*Correspondence to:* Christian Mark Salvador (salvadorcg@ornl.gov) and Melanie Mayes (mayesma@ornl.gov)

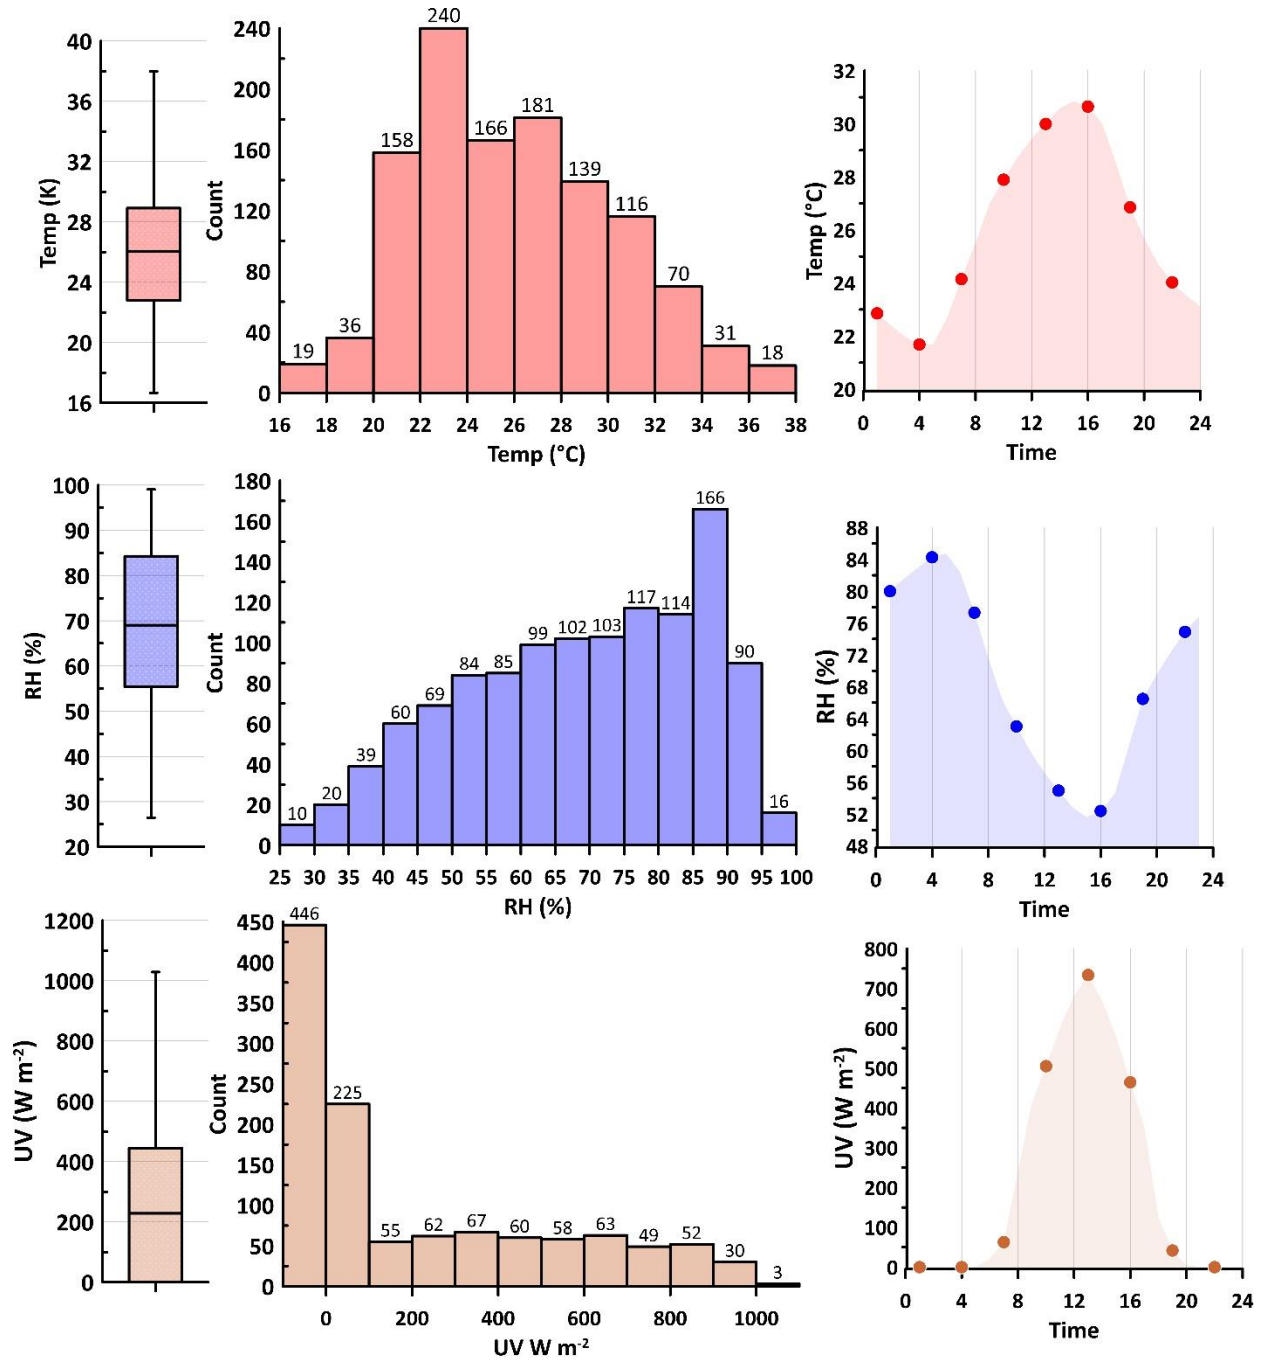

**Figure S1.** Box-Whisker plot, histogram, and diurnal profile of (top) temperature, (mid) relative humidity, and (bottom) global solar radiation. Temperature and relative humidity were collected from a nearby airport monitoring site (KCOU) while global radiation was measured in a were measured in weather site in Ashland, MO, 5.22 kilometers from the MOFLUX site.

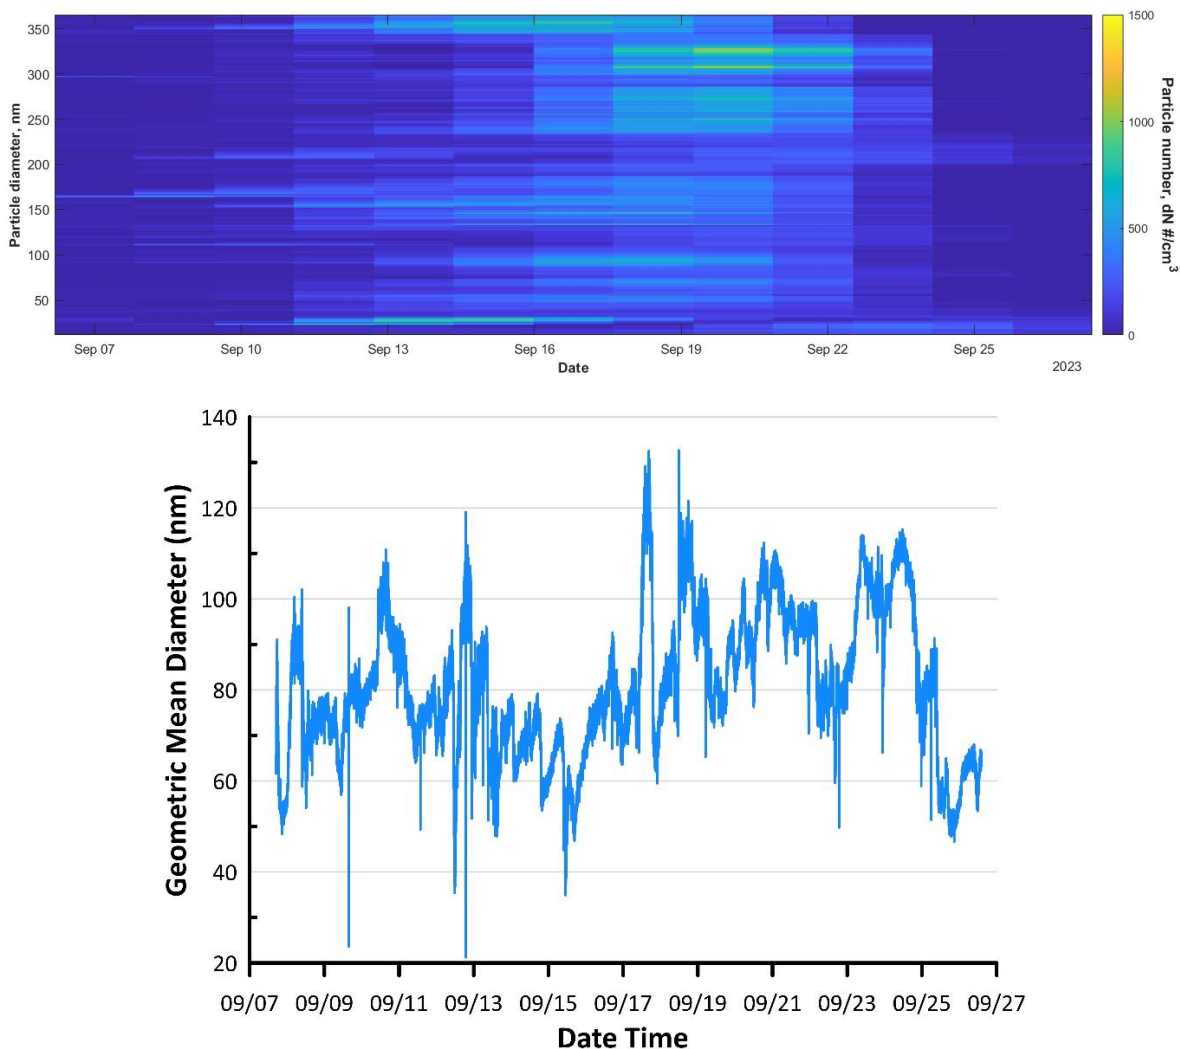

**Figure S2.** (Top) Particle size distribution and (bottom) geometric mean diameter (GMD) of the particles observed at MOFLUX. Note that the aerosol measurements were performed after the VOC collection data provided in the main text. The real-time nanoparticle size measurements were implemented using a NanoScan Scanning Mobility Particle Sizer (SMPS, TSI) spectrometer with size distribution from 10 to 420 nm in one minute time interval. The time series of GMD shows that most of the particles have a diameter greater than 50 nm most of the time, with no apparent particle growth from smaller particles (~10 nm). Note that the particle measurements were performed after the VOC monitoring duration indicated in the main text.

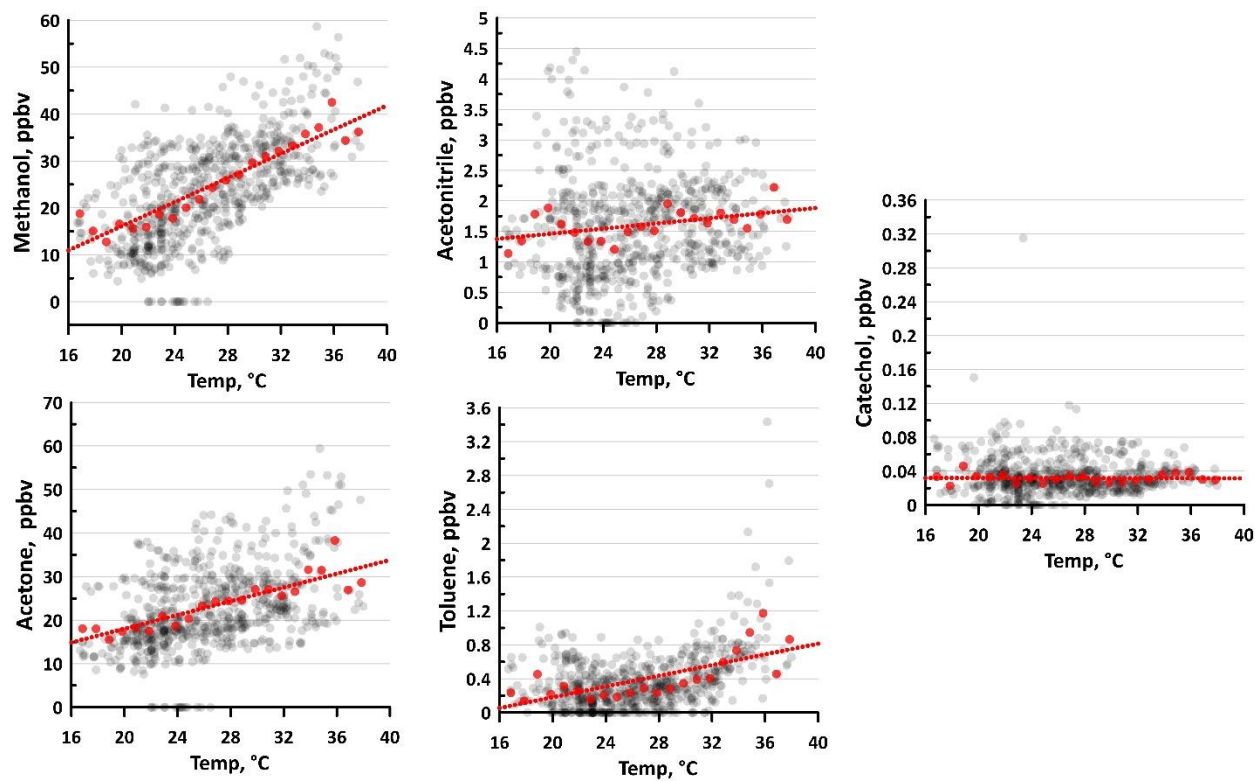

**Figure S3.** The correlation analysis of temperature and mixing ratios of other VOCs not included in Figure 3. Black symbols are hourly data while the red lines indicate the best-fit line of the binned mixing ratio of VOCs according to 1.0 °C of temperature

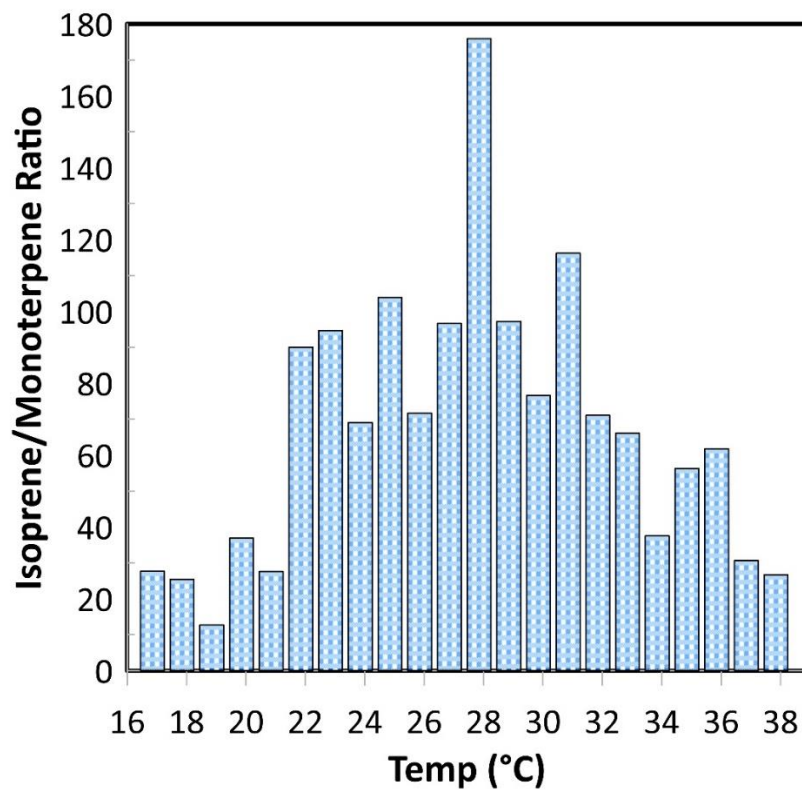

**Figure S4.** Ratio of monoterpene and isoprene mixing ratio binned to temperature. A bell-shaped profile was observed from the plot of temperature and ratio, with the maximum occurring at 28°C.

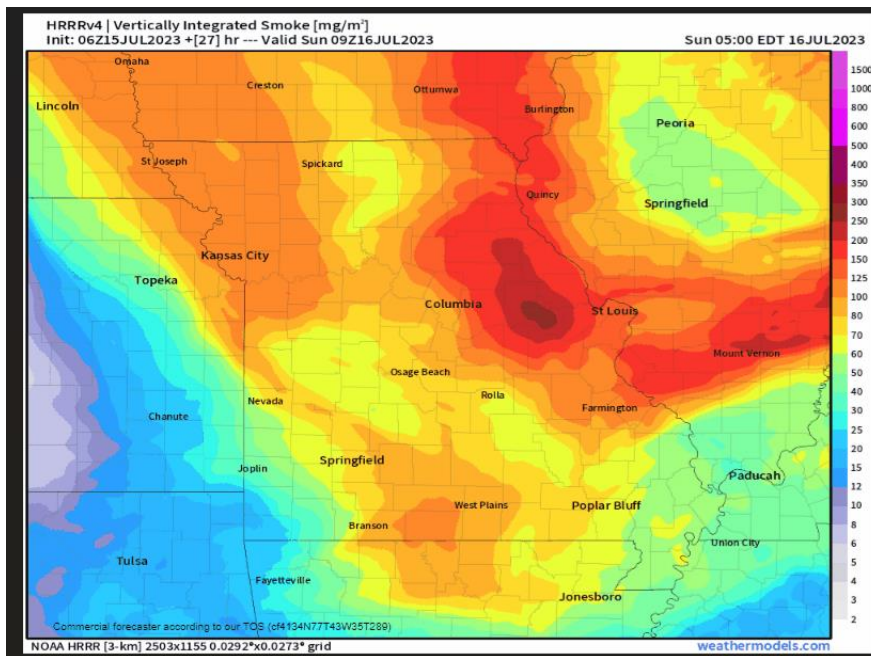

**Figure S5.** Atmospheric dispersion of the smoke observed during July 16, 2023. The smoke snapshot coincided with the day with highest smoke concentration observed during the MOFLUX VOC measurement.

### **Text S1.** Calculation of Ozone Forming Potential

The impact of transported wildfire emissions on the formation of ozone was calculated using the incremental reactivity, based on the response of the ozone levels to the incremental increase of benzene, divided by the mixing ratio of benzene. The ozone formation potential (Carter, 1994, 2009) of toluene in MOFLUX during the long range transport of biomass burning from Canada was determined as the products of the toluene and the maximum incremental reactivity coefficient (MIR) given by the following equation:

$$OFP_{benzene} = [benzene] \times MIR$$

### **Reference**

- Carter, W. P. L.: Development of Ozone Reactivity Scales for Volatile Organic Compounds, Air & Waste, 44, 881-899, 10.1080/1073161X.1994.10467290, 1994.
- Carter, W. P. L.: Updated Maximum Incremental Reactivity Scale and Hydrocarbon Bin Reactivities for Regulatory Applications, California Air Resources Board Contract 07-339, 2009.

**Table S1.** List of all identified ions with the corresponding suggested molecular formula measured from MOFLUX site. N/A – No possible suggested molecular formula; *mDa* – Absolute difference of experimental (Exp) m/z and monoisotopic (Theor) mass in terms of milliDalton; *DU* – Degree of Unsaturation; *O:C* – oxygen to carbon ratio; *H:C* – hydrogen to oxygen ratio; *Csat* - effective saturation mass mixing ratio ( $\mu\text{g m}^{-3}$ ); *Ave Conc* – concentration of the VOC between July 8 to 17.

| Exp. Mass [M+H] | Molecular Formula               | Theor. Mass [M] | mDa   | DU  | O:C  | H:C  | Csat  | Ave Conc. (ppb) |
|-----------------|---------------------------------|-----------------|-------|-----|------|------|-------|-----------------|
| 40.023          | C <sub>2</sub> HN               | 39.011          | 4.59  | 3   | 0.00 | 0.50 | 5.43  | 0.059           |
| 41.035          | C <sub>3</sub> H <sub>4</sub>   | 40.031          | -4    | 2   | 0.00 | 1.33 | 10.45 | 5.753           |
| 42.006          | C <sub>2</sub> HO               | 41.003          | -3.92 | 2.5 | 0.50 | 0.50 | 9.53  | 0.009           |
| 42.031          | C <sub>2</sub> H <sub>3</sub> N | 41.027          | -2.61 | 2   | 0.00 | 1.50 | 5.43  | 0.892           |
| 42.044          | C <sub>3</sub> H <sub>5</sub>   | 41.039          | -2.2  | 1.5 | 0.00 | 1.67 | 10.45 | 0.037           |
| 43.014          | C <sub>2</sub> H <sub>2</sub> O | 42.011          | -4.02 | 2   | 0.50 | 1.00 | 9.53  | 12.872          |
| 43.031          | CH <sub>2</sub> N <sub>2</sub>  | 42.022          | 2.4   | 2   | 0.00 | 2.00 | 6.88  | 0.019           |
| 43.050          | C <sub>3</sub> H <sub>6</sub>   | 42.047          | -4.09 | 1   | 0.00 | 2.00 | 10.45 | 1.073           |
| 44.019          | CHNO                            | 43.006          | 6.24  | 2   | 1.00 | 1.00 | 9.30  | 0.253           |
| 44.064          | C <sub>3</sub> H <sub>7</sub>   | 43.055          | 2.24  | 0.5 | 0.00 | 2.33 | 10.45 | 0.040           |
| 44.977          | CS                              | 43.972          | -1.95 | 2   | 0.00 | 0.00 | 11.40 | 0.137           |
| 44.997          | CO <sub>2</sub>                 | 43.990          | -0.25 | 2   | 2.00 | 0.00 | 9.80  | 0.071           |
| 45.025          | CH <sub>2</sub> NO              | 44.014          | 4.11  | 1.5 | 1.00 | 2.00 | 9.30  | 2.400           |
| 45.031          | C <sub>2</sub> H <sub>4</sub> O | 44.026          | -2.2  | 1   | 0.50 | 2.00 | 9.53  | 4.864           |
| 45.988          | CHS                             | 44.980          | 1.28  | 1.5 | 0.00 | 1.00 | 11.40 | 0.961           |
| 46.023          | CH <sub>3</sub> NO              | 45.022          | -5.74 | 1   | 1.00 | 3.00 | 9.30  | 0.159           |
| 46.032          | CH <sub>3</sub> NO              | 45.022          | 2.97  | 1   | 1.00 | 3.00 | 9.30  | 0.668           |
| 46.062          | C <sub>2</sub> H <sub>7</sub> N | 45.058          | -3.37 | 0   | 0.00 | 3.50 | 5.43  | 0.009           |
| 47.007          | CH <sub>2</sub> O <sub>2</sub>  | 46.006          | -5.66 | 1   | 2.00 | 2.00 | 9.80  | 0.839           |
| 47.017          | CH <sub>2</sub> O <sub>2</sub>  | 46.006          | 4.64  | 1   | 2.00 | 2.00 | 9.80  | 0.124           |
| 47.040          | CH <sub>4</sub> NO              | 46.029          | 3.81  | 0.5 | 1.00 | 4.00 | 9.30  | 0.504           |
| 47.047          | C <sub>2</sub> H <sub>6</sub> O | 46.042          | -2.19 | 0   | 0.50 | 3.00 | 9.53  | 1.030           |
| 47.991          | HNS                             | 46.983          | 0.81  | 1   | 0.00 | 0.00 | 9.98  | 0.006           |
| 48.007          | HNO <sub>2</sub>                | 47.001          | -1.29 | 1   | 0.00 | 0.00 | 9.58  | 0.029           |
| 48.049          | CH <sub>5</sub> NO              | 47.037          | 4.32  | 0   | 1.00 | 5.00 | 9.30  | 0.043           |
| 49.008          | CH <sub>4</sub> S               | 48.003          | -2.32 | 0   | 0.00 | 4.00 | 11.40 | 0.016           |
| 49.999          | HO <sub>3</sub>                 | 48.993          | -1.02 | 0.5 | 0.00 | 0.00 | 11.28 | 0.012           |
| 51.043          | N/A                             |                 |       |     | 0.00 | 0.00 |       | 0.132           |
| 53.038          | C <sub>4</sub> H <sub>4</sub>   | 52.031          | -0.56 | 3   | 0.00 | 1.00 | 9.98  | 0.069           |
| 54.034          | C <sub>3</sub> H <sub>3</sub> N | 53.027          | 0.3   | 3   | 0.00 | 1.00 |       | 0.024           |
| 55.017          | C <sub>3</sub> H <sub>2</sub> O | 54.011          | -1.09 | 3   | 0.33 | 0.67 | 8.90  | 0.061           |
| 55.039          | C <sub>3</sub> H <sub>4</sub> N | 54.034          | -2.84 | 2.5 | 0.00 | 1.33 |       | 1.133           |
| 55.054          | C <sub>4</sub> H <sub>6</sub>   | 54.047          | -0.17 | 2   | 0.00 | 1.50 | 9.98  | 0.722           |
| 56.021          | C <sub>3</sub> H <sub>3</sub> O | 55.018          | -4.84 | 2.5 | 0.33 | 1.00 | 8.90  | 0.007           |
| 56.059          | C <sub>4</sub> H <sub>7</sub>   | 55.055          | -3.27 | 1.5 | 0.00 | 1.75 | 9.98  | 0.015           |



| Exp. Mass<br>[M+H] | Molecular<br>Formula                           | Theor.<br>Mass [M] | mDa   | DU  | O:C  | H:C  | Csat  | Ave Conc.<br>(ppb) |
|--------------------|------------------------------------------------|--------------------|-------|-----|------|------|-------|--------------------|
| 57.032             | C <sub>3</sub> H <sub>4</sub> O                | 56.026             | -1.19 | 2   | 0.33 | 1.33 | 8.90  | 1.102              |
| 57.070             | C <sub>4</sub> H <sub>8</sub>                  | 56.063             | 0.17  | 1   | 0.00 | 2.00 | 9.98  | 0.773              |
| 58.068             | C <sub>3</sub> H <sub>7</sub> N                | 57.058             | 3.15  | 1   | 0.00 | 2.33 |       | 0.025              |
| 59.049             | C <sub>3</sub> H <sub>6</sub> O                | 58.042             | 0.03  | 1   | 0.33 | 2.00 | 8.90  |                    |
| 59.967             | N/A                                            |                    |       |     | 0.00 | 0.00 |       | 0.064              |
| 59.994             | CHNS                                           | 58.983             | 3.26  | 2   | 0.00 | 1.00 | 8.60  | 0.009              |
| 60.023             | C <sub>2</sub> H <sub>3</sub> O <sub>2</sub>   | 59.013             | 2.9   | 1.5 | 1.00 | 1.50 | 8.73  | 0.013              |
| 60.049             | C <sub>2</sub> H <sub>5</sub> NO               | 59.037             | 4.59  | 1   | 0.50 | 2.50 |       | 0.743              |
| 61.029             | C <sub>2</sub> H <sub>4</sub> O <sub>2</sub>   | 60.021             | 0.25  | 1   | 1.00 | 2.00 | 8.73  | 3.293              |
| 61.053             | C <sub>2</sub> H <sub>6</sub> NO               | 60.045             | 1.07  | 0.5 | 0.50 | 3.00 |       | 0.053              |
| 61.980             | CHOS                                           | 60.975             | -2.4  | 1.5 | 1.00 | 1.00 | 10.30 | 0.007              |
| 62.028             | CH <sub>3</sub> NO <sub>2</sub>                | 61.016             | 4.61  | 1   | 2.00 | 3.00 |       | 0.111              |
| 62.060             | C <sub>2</sub> H <sub>7</sub> NO               | 61.053             | 0.13  | 0   | 0.50 | 3.50 |       | 0.028              |
| 63.026             | C <sub>2</sub> H <sub>6</sub> S                | 62.019             | -0.65 | 0   | 0.00 | 3.00 | 10.93 | 0.094              |
| 63.044             | C <sub>2</sub> H <sub>6</sub> O <sub>2</sub>   | 62.037             | -0.5  | 0   | 1.00 | 3.00 | 8.73  | 0.057              |
| 65.024             | CH <sub>4</sub> O <sub>3</sub>                 | 64.016             | 0.65  | 0   | 3.00 | 4.00 | 9.45  | 0.011              |
| 65.039             | C <sub>5</sub> H <sub>4</sub>                  | 64.031             | 0.91  | 4   | 0.00 | 0.80 | 9.50  | 0.008              |
| 65.059             | N/A                                            |                    |       |     | 0.00 | 0.00 |       | 0.030              |
| 67.054             | C <sub>5</sub> H <sub>6</sub>                  | 66.047             | -0.24 | 3   | 0.00 | 1.20 | 9.50  | 0.417              |
| 68.057             | C <sub>5</sub> H <sub>7</sub>                  | 67.055             | -4.93 | 2.5 | 0.00 | 1.40 | 9.50  | 0.090              |
| 68.998             | C <sub>3</sub> O <sub>2</sub>                  | 67.990             | 0.94  | 4   | 0.67 | 0.00 | 7.89  | 0.033              |
| 69.032             | C <sub>4</sub> H <sub>4</sub> O                | 68.026             | -1.32 | 3   | 0.25 | 1.00 | 8.34  | 0.218              |
| 69.070             | C <sub>5</sub> H <sub>8</sub>                  | 68.063             | 0.01  | 2   | 0.00 | 1.60 | 9.50  |                    |
| 70.068             | C <sub>4</sub> H <sub>7</sub> N                | 69.058             | 2.59  | 2   | 0.00 | 1.75 | 15.28 | 0.025              |
| 71.012             | C <sub>3</sub> H <sub>2</sub> O <sub>2</sub>   | 70.006             | -0.62 | 3   | 0.67 | 0.67 | 7.89  | 0.128              |
| 71.050             | C <sub>4</sub> H <sub>6</sub> O                | 70.042             | 0.46  | 2   | 0.25 | 1.50 | 8.34  | 7.228              |
| 71.068             | C <sub>4</sub> H <sub>8</sub> N                | 70.066             | -5.25 | 1.5 | 0.00 | 2.00 | 15.28 | 0.019              |
| 71.086             | C <sub>5</sub> H <sub>10</sub>                 | 70.078             | -0.01 | 1   | 0.00 | 2.00 | 9.50  | 0.058              |
| 72.045             | C <sub>3</sub> H <sub>5</sub> NO               | 71.037             | 0.68  | 2   | 0.33 | 1.67 | 8.35  | 0.755              |
| 72.087             | C <sub>4</sub> H <sub>9</sub> N                | 71.074             | 5.8   | 1   | 0.00 | 2.25 | 15.28 | 0.011              |
| 72.998             | C <sub>2</sub> H <sub>2</sub> NS               | 71.991             | -0.21 | 2.5 | 0.00 | 1.00 | 5.43  | 0.015              |
| 73.028             | C <sub>3</sub> H <sub>4</sub> O <sub>2</sub>   | 72.021             | -0.04 | 2   | 0.67 | 1.33 | 7.89  | 0.386              |
| 73.046             | C <sub>2</sub> H <sub>4</sub> N <sub>2</sub> O | 72.032             | 6.21  | 2   | 0.50 | 2.00 | 5.73  | 0.013              |
| 73.065             | C <sub>4</sub> H <sub>8</sub> O                | 72.058             | -0.02 | 1   | 0.25 | 2.00 | 8.34  |                    |
| 74.007             | C <sub>2</sub> H <sub>3</sub> NS               | 72.999             | 1.14  | 2   | 0.00 | 1.50 | 5.43  | 0.056              |
| 74.029             | C <sub>2</sub> H <sub>3</sub> NO <sub>2</sub>  | 73.016             | 5.84  | 2   | 1.00 | 1.50 | 5.03  | 0.039              |
| 74.060             | C <sub>3</sub> H <sub>7</sub> NO               | 73.053             | 0.31  | 1   | 0.33 | 2.33 | 8.35  | 2.073              |
| 74.994             | C <sub>2</sub> H <sub>2</sub> OS               | 73.983             | 3.93  | 2   | 0.50 | 1.00 | 9.53  | 0.027              |
| 75.044             | C <sub>3</sub> H <sub>6</sub> O <sub>2</sub>   | 74.037             | 0.42  | 1   | 0.67 | 2.00 | 7.89  | 2.256              |
| 75.065             | C <sub>3</sub> H <sub>8</sub> NO               | 74.061             | -2.93 | 0.5 | 0.33 | 2.67 | 8.35  | 0.082              |
| 75.944             | N/A                                            |                    |       |     | 0.00 | 0.00 |       | 0.008              |

| Exp. Mass<br>[M+H] | Molecular<br>Formula                           | Theor.<br>Mass [M] | mDa   | DU  | O:C  | H:C  | Csat  | Ave Conc.<br>(ppb) |
|--------------------|------------------------------------------------|--------------------|-------|-----|------|------|-------|--------------------|
| 76.044             | C <sub>2</sub> H <sub>5</sub> NO <sub>2</sub>  | 75.032             | 4.66  | 1   | 1.00 | 2.50 | 5.03  | 0.094              |
| 76.069             | C <sub>3</sub> H <sub>9</sub> NO               | 75.068             | -6.54 | 0   | 0.33 | 3.00 | 8.35  | 0.006              |
| 77.023             | C <sub>2</sub> H <sub>4</sub> O <sub>3</sub>   | 76.016             | -0.04 | 1   | 1.50 | 2.00 | 8.17  | 0.045              |
| 77.043             | C <sub>3</sub> H <sub>8</sub> S                | 76.035             | 1.22  | 0   | 0.00 | 2.67 | 10.45 | 0.011              |
| 77.058             | C <sub>3</sub> H <sub>8</sub> O <sub>2</sub>   | 76.052             | -1.52 | 0   | 0.67 | 2.67 | 7.89  | 0.023              |
| 79.033             | CH <sub>6</sub> N <sub>2</sub> S               | 78.025             | 0.22  | 0   | 0.00 | 6.00 | 6.88  | 0.009              |
| 79.054             | C <sub>6</sub> H <sub>6</sub>                  | 78.047             | -0.18 | 4   | 0.00 | 1.00 | 9.03  | 0.102              |
| 80.055             | C <sub>5</sub> H <sub>5</sub> N                | 79.042             | 5.02  | 4   | 0.00 | 1.00 | 12.10 | 0.030              |
| 80.995             | C <sub>4</sub> O <sub>2</sub>                  | 79.990             | -1.64 | 5   | 0.50 | 0.00 | 7.18  | 0.057              |
| 81.035             | C <sub>5</sub> H <sub>4</sub> O                | 80.026             | 1.67  | 4   | 0.20 | 0.80 | 7.80  | 0.043              |
| 81.070             | C <sub>6</sub> H <sub>8</sub>                  | 80.063             | 0.13  | 3   | 0.00 | 1.33 | 9.03  | 0.348              |
| 82.036             | C <sub>5</sub> H <sub>5</sub> O                | 81.034             | -5.4  | 3.5 | 0.20 | 1.00 | 7.80  | 0.005              |
| 82.074             | C <sub>6</sub> H <sub>9</sub>                  | 81.070             | -4.08 | 2.5 | 0.00 | 1.50 | 9.03  | 0.017              |
| 82.987             | C <sub>3</sub> NS                              | 81.975             | 4.63  | 4.5 | 0.00 | 0.00 |       | 0.025              |
| 83.050             | C <sub>5</sub> H <sub>6</sub> O                | 82.042             | 0.6   | 3   | 0.20 | 1.20 | 7.80  | 0.451              |
| 83.086             | C <sub>6</sub> H <sub>10</sub>                 | 82.078             | 0.15  | 2   | 0.00 | 1.67 | 9.03  | 0.183              |
| 84.049             | C <sub>4</sub> H <sub>5</sub> NO               | 83.037             | 4.84  | 3   | 0.25 | 1.25 | 7.88  | 0.042              |
| 84.087             | C <sub>5</sub> H <sub>9</sub> N                | 83.074             | 6.42  | 2   | 0.00 | 1.80 | 12.10 | 0.013              |
| 84.965             | N/A                                            |                    |       |     | 0.00 | 0.00 |       | 0.025              |
| 85.029             | C <sub>4</sub> H <sub>4</sub> O <sub>2</sub>   | 84.021             | 0.23  | 3   | 0.50 | 1.00 | 7.18  | 0.164              |
| 85.064             | C <sub>5</sub> H <sub>8</sub> O                | 84.058             | -0.46 | 2   | 0.20 | 1.60 | 7.80  | 0.254              |
| 85.101             | C <sub>6</sub> H <sub>12</sub>                 | 84.094             | 0.08  | 1   | 0.00 | 2.00 | 9.03  | 0.013              |
| 86.025             | C <sub>3</sub> H <sub>3</sub> NO <sub>2</sub>  | 85.016             | 1.31  | 3   | 0.67 | 1.00 | 5.45  | 0.020              |
| 87.007             | C <sub>3</sub> H <sub>2</sub> O <sub>3</sub>   | 86.000             | -0.68 | 3   | 1.00 | 0.67 | 7.15  | 0.025              |
| 87.046             | C <sub>4</sub> H <sub>6</sub> O <sub>2</sub>   | 86.037             | 1.52  | 2   | 0.50 | 1.50 | 7.18  | 0.697              |
| 87.077             | C <sub>5</sub> H <sub>10</sub> O               | 86.073             | -2.95 | 1   | 0.20 | 2.00 | 7.80  | 0.023              |
| 88.017             | C <sub>3</sub> H <sub>5</sub> NS               | 87.014             | -4.22 | 2   | 0.00 | 1.67 |       | 0.036              |
| 88.032             | C <sub>4</sub> H <sub>7</sub> S                | 87.027             | -2.58 | 1.5 | 0.00 | 1.75 | 9.98  | 0.446              |
| 88.064             | C <sub>3</sub> H <sub>7</sub> N <sub>2</sub> O | 87.056             | 0.99  | 1.5 | 0.33 | 2.33 | 3.75  | 1.435              |
| 88.078             | C <sub>4</sub> H <sub>9</sub> NO               | 87.068             | 2.31  | 1   | 0.25 | 2.25 | 7.88  | 0.013              |
| 89.022             | c <sub>3</sub> H <sub>4</sub> O <sub>3</sub>   | 88.016             | -1.1  | 2   | 1.00 | 1.33 | 7.15  | 0.043              |
| 89.055             | C <sub>4</sub> H <sub>8</sub> O <sub>2</sub>   | 88.052             | -5.07 | 1   | 0.50 | 2.00 | 7.18  | 0.275              |
| 90.021             | C <sub>2</sub> H <sub>3</sub> NO <sub>3</sub>  | 89.011             | 2.12  | 2   | 1.50 | 1.50 | 4.83  | 0.023              |
| 90.042             | C <sub>3</sub> H <sub>7</sub> NS               | 89.030             | 4.43  | 1   | 0.00 | 2.33 |       | 0.243              |
| 90.058             | C <sub>3</sub> H <sub>7</sub> NO <sub>2</sub>  | 89.048             | 3.28  | 1   | 0.67 | 2.33 | 5.45  | 0.016              |
| 91.031             | C <sub>2</sub> H <sub>4</sub> NO <sub>3</sub>  | 90.019             | 4.3   | 1.5 | 1.50 | 2.00 | 4.83  | 0.026              |
| 91.054             | C <sub>7</sub> H <sub>6</sub>                  | 90.047             | -0.52 | 5   | 0.00 | 0.86 | 8.55  | 0.031              |
| 92.031             | C <sub>2</sub> H <sub>5</sub> NO <sub>3</sub>  | 91.027             | -2.94 | 1   | 1.50 | 2.50 | 4.83  | 0.010              |
| 92.059             | C <sub>7</sub> H <sub>7</sub>                  | 91.055             | -3.11 | 4.5 | 0.00 | 1.00 | 8.55  | 0.009              |
| 93.006             | C <sub>2</sub> H <sub>4</sub> O <sub>2</sub> S | 91.993             | 5.39  | 1   | 1.00 | 2.00 | 8.73  | 0.007              |
| 93.037             | C <sub>6</sub> H <sub>4</sub> O                | 92.026             | 3.19  | 5   | 0.17 | 0.67 | 7.28  | 0.739              |

| Exp. Mass<br>[M+H] | Molecular<br>Formula | Theor.<br>Mass [M] | mDa        | DU  | O:C  | H:C  | Csat  | Ave Conc.<br>(ppb) |
|--------------------|----------------------|--------------------|------------|-----|------|------|-------|--------------------|
| 93.070             | C7H8                 | 92.063             | -0.07      | 4   | 0.00 | 1.14 | 8.55  | 0.330              |
| 93.956             | CHOS2                | 92.947             | 1.88       | 1.5 | 1.00 | 1.00 | 10.30 | 0.140              |
| 94.041             | CH7N3S               | 93.036             | -2.13      | 0   | 0.00 | 7.00 | 5.03  | 0.598              |
| 94.070             | C6H7N                | 93.058             | 4.48       | 4   | 0.00 | 1.17 | 10.73 | 0.059              |
| 95.013             | C5H2O2               | 94.006             | -0.11      | 5   | 0.40 | 0.40 | 6.53  | 0.054              |
| 95.026             | C4H2N2O              | 94.017             | 1.8        | 5   | 0.25 | 0.50 |       | 0.067              |
| 95.049             | C6H6O                | 94.042             | -0.12      | 4   | 0.17 | 1.00 | 7.28  | 0.102              |
| 95.085             | C7H10                | 94.078             | -0.1       | 3   | 0.00 | 1.43 | 8.55  | 0.028              |
| 95.951             | HNOS2                | 94.950             | -5.8       | 1   | 0.00 | 0.00 | 9.78  | 0.050              |
| 96.051             | C6H7O                | 95.050             | -5.55      | 3.5 | 0.17 | 1.17 | 7.28  | 0.007              |
| 96.959             | O4S                  | 95.952             | -0.16      | 1   | 0.00 | 0.00 | 11.08 | 0.031              |
| 97.028             | C5H4O2               | 96.021             | 0.08       | 4   | 0.40 | 0.80 | 6.53  | 0.075              |
| 97.065             | C6H8O                | 96.058             | 0.04       | 3   | 0.17 | 1.33 | 7.28  | 0.055              |
| 97.101             | C7H12                | 96.094             | 0.02       | 2   | 0.00 | 1.71 | 8.55  | 0.041              |
| 97.949             | HO2S2                | 96.942             | 0.29       | 0.5 | 0.00 | 0.00 | 11.48 | 0.007              |
| 98.032             | C5H5O2               | 97.029             | -4.67      | 3.5 | 0.40 | 1.00 | 6.53  | 0.017              |
| 98.063             | C5H7NO               | 97.053             | 2.72       | 3   | 0.20 | 1.40 | 7.40  | 0.012              |
| 98.952             | H2O2S2               | 97.950             | -4.48      | 0   | 0.00 | 0.00 | 11.48 | 0.027              |
| 98.980             | H2O4S                | 97.967             | 5.55       | 0   | 0.00 | 0.00 | 11.08 | 0.014              |
| 99.007             | C4H2O3               | 98.000             | -1         | 4   | 0.75 | 0.50 | 6.29  | 0.006              |
| 99.015             | C3H2N2O2             | 98.012             | -3.66      | 4   | 0.67 | 0.67 | 6.25  | 0.024              |
| 99.045             | C5H6O2               | 98.037             | 0.57       | 3   | 0.40 | 1.20 | 6.53  | 0.816              |
| 99.082             | C6H10O               | 98.073             | 1.4        | 2   | 0.17 | 1.67 | 7.28  | 0.196              |
| 100.040            | C4H5NO2              | 99.032             | 1.1        | 3   | 0.50 | 1.25 | 5.28  | 0.168              |
| 100.077            | C5H9NO               | 99.068             | 1.01       | 2   | 0.20 | 1.80 | 7.40  | 0.012              |
| 100.938            | N/A                  |                    |            |     | 0.00 | 0.00 |       | 0.057              |
| 101.024            | C4H4O3               | 100.016            | 0.18       | 3   | 0.75 | 1.00 | 6.29  | 0.107              |
| 101.061            | C5H8O2               | 100.052            | 0.99       | 2   | 0.40 | 1.60 | 6.53  | 0.493              |
| 101.097            | C6H12O               | 100.089            | 1.11       | 1   | 0.17 | 2.00 | 7.28  | 0.026              |
| 102.056            | C4H7NO2              | 101.048            | 0.75       | 2   | 0.50 | 1.75 | 5.28  | 0.081              |
| 102.092            | C5H11NO              | 101.084            | 0.26       | 1   | 0.20 | 2.20 | 7.40  | 0.006              |
| 102.934            | C3H2S2               | 101.960            | -<br>32.67 | 3   | 0.00 | 0.67 | 10.45 | 0.024              |
| 103.040            | C4H6O3               | 102.032            | 0.73       | 2   | 0.75 | 1.50 | 6.29  | 0.058              |
| 103.061            | C5H10S               | 102.050            | 3.1        | 1   | 0.00 | 2.00 | 9.50  | 0.006              |
| 103.086            | C4H10N2O             | 102.079            | -0.79      | 1   | 0.25 | 2.50 |       | 0.045              |
| 104.048            | C7H5N                | 103.042            | -1.88      | 6   | 0.00 | 0.71 | 9.80  | 0.039              |
| 104.070            | C4H9NO2              | 103.063            | -1.1       | 1   | 0.50 | 2.25 | 5.28  | 0.017              |
| 104.933            | N/A                  |                    |            |     | 0.00 | 0.00 |       | 0.005              |
| 105.034            | C4H8OS               | 104.030            | -2.66      | 1   | 0.25 | 2.00 | 8.34  | 0.070              |
| 105.070            | C8H8                 | 104.063            | -0.08      | 5   | 0.00 | 1.00 | 8.08  | 0.020              |
| 106.037            | C3H7NOS              | 105.025            | 4.39       | 1   | 0.33 | 2.33 | 8.35  | 0.007              |

| Exp. Mass [M+H] | Molecular Formula                               | Theor. Mass [M] | mDa   | DU  | O:C  | H:C  | Csat  | Ave Conc. (ppb) |
|-----------------|-------------------------------------------------|-----------------|-------|-----|------|------|-------|-----------------|
| 106.963         | C <sub>2</sub> H <sub>2</sub> OS <sub>2</sub>   | 105.955         | 1.12  | 2   | 0.50 | 1.00 | 9.53  | 0.035           |
| 107.050         | C <sub>7</sub> H <sub>6</sub> O                 | 106.042         | 0.66  | 5   | 0.14 | 0.86 | 6.78  | 0.025           |
| 107.085         | C <sub>8</sub> H <sub>10</sub>                  | 106.078         | -0.53 | 4   | 0.00 | 1.25 | 8.08  | 0.083           |
| 107.970         | C <sub>2</sub> H <sub>3</sub> OS <sub>2</sub>   | 106.963         | -0.11 | 1.5 | 0.50 | 1.50 | 9.53  | 0.023           |
| 108.044         | C <sub>6</sub> H <sub>5</sub> NO                | 107.037         | -0.39 | 5   | 0.17 | 0.83 | 6.93  | 0.006           |
| 108.082         | C <sub>7</sub> H <sub>9</sub> N                 | 107.074         | 0.72  | 4   | 0.00 | 1.29 | 9.80  | 0.044           |
| 108.959         | CO <sub>4</sub> S                               | 107.952         | -0.41 | 2   | 4.00 | 0.00 | 9.16  | 0.488           |
| 109.048         | C <sub>3</sub> H <sub>8</sub> O <sub>4</sub>    | 108.042         | -1.54 | 0   | 1.33 | 2.67 | 6.56  | 0.067           |
| 109.067         | C <sub>7</sub> H <sub>8</sub> O                 | 108.058         | 2.01  | 4   | 0.14 | 1.14 | 6.78  | 0.033           |
| 109.101         | C <sub>8</sub> H <sub>12</sub>                  | 108.094         | -0.08 | 3   | 0.00 | 1.50 | 8.08  | 0.018           |
| 109.958         | HN <sub>2</sub> OS <sub>2</sub>                 | 108.953         | -2.51 | 1.5 | 0.00 | 0.00 | 7.88  | 0.010           |
| 110.044         | C <sub>2</sub> H <sub>7</sub> NO <sub>4</sub>   | 109.038         | -1.18 | 0   | 2.00 | 3.50 | 4.63  | 0.006           |
| 110.960         | CH <sub>2</sub> O <sub>2</sub> S <sub>2</sub>   | 109.950         | 2.8   | 1   | 2.00 | 2.00 | 9.80  | 0.010           |
| 111.044         | C <sub>6</sub> H <sub>6</sub> O <sub>2</sub>    | 110.037         | -0.06 | 4   | 0.33 | 1.00 | 5.93  | 0.026           |
| 111.054         | C <sub>5</sub> H <sub>6</sub> N <sub>2</sub> O  | 110.048         | -1.69 | 4   | 0.20 | 1.20 |       | 0.018           |
| 111.081         | C <sub>7</sub> H <sub>10</sub> O                | 110.073         | 0.26  | 3   | 0.14 | 1.43 | 6.78  | 0.027           |
| 111.117         | C <sub>8</sub> H <sub>14</sub>                  | 110.110         | 0.17  | 2   | 0.00 | 1.75 | 8.08  | 0.012           |
| 111.975         | HNO <sub>4</sub> S                              | 110.963         | 4.89  | 1   | 0.00 | 0.00 | 9.18  | 0.006           |
| 112.046         | C <sub>6</sub> H <sub>7</sub> O <sub>2</sub>    | 111.045         | -6.18 | 3.5 | 0.33 | 1.17 | 5.93  | 0.009           |
| 112.078         | C <sub>6</sub> H <sub>9</sub> NO                | 111.068         | 1.91  | 3   | 0.17 | 1.50 | 6.93  | 0.007           |
| 112.951         | O <sub>5</sub> S                                | 111.947         | -2.92 | 1   | 0.00 | 0.00 | 10.88 | 0.008           |
| 113.024         | C <sub>5</sub> H <sub>4</sub> O <sub>3</sub>    | 112.016         | 0.88  | 4   | 0.60 | 0.80 | 5.53  | 0.386           |
| 113.064         | C <sub>6</sub> H <sub>8</sub> O <sub>2</sub>    | 112.052         | 4.59  | 3   | 0.33 | 1.33 | 5.93  | 0.085           |
| 113.096         | C <sub>7</sub> H <sub>12</sub> O                | 112.089         | -0.29 | 2   | 0.14 | 1.71 | 6.78  | 0.046           |
| 114.016         | C <sub>4</sub> H <sub>3</sub> NO <sub>3</sub>   | 113.011         | -2.37 | 4   | 0.75 | 0.75 | 3.88  | 0.024           |
| 114.055         | C <sub>5</sub> H <sub>7</sub> NO <sub>2</sub>   | 113.048         | -0.05 | 3   | 0.40 | 1.40 | 4.95  | 0.066           |
| 114.092         | C <sub>6</sub> H <sub>11</sub> NO               | 113.084         | 0.26  | 2   | 0.17 | 1.83 | 6.93  | 0.077           |
| 115.008         | C <sub>4</sub> H <sub>2</sub> O <sub>4</sub>    | 113.995         | 5.42  | 4   | 1.00 | 0.50 | 5.58  | 0.017           |
| 115.040         | C <sub>5</sub> H <sub>6</sub> O <sub>3</sub>    | 114.032         | 1.03  | 3   | 0.60 | 1.20 | 5.53  | 0.081           |
| 115.077         | C <sub>6</sub> H <sub>10</sub> O <sub>2</sub>   | 114.068         | 1.64  | 2   | 0.33 | 1.67 | 5.93  | 0.097           |
| 115.109         | C <sub>7</sub> H <sub>14</sub> O                | 114.105         | -2.74 | 1   | 0.14 | 2.00 | 6.78  | 0.027           |
| 116.071         | C <sub>5</sub> H <sub>9</sub> NO <sub>2</sub>   | 115.063         | 0.3   | 2   | 0.40 | 1.80 | 4.95  | 3.128           |
| 116.907         | N/A                                             |                 |       |     | 0.00 | 0.00 |       | 0.176           |
| 117.016         | C <sub>4</sub> H <sub>4</sub> O <sub>4</sub>    | 116.011         | -2.24 | 3   | 1.00 | 1.00 | 5.58  | 0.019           |
| 117.044         | C <sub>4</sub> H <sub>8</sub> N <sub>2</sub> S  | 116.041         | -4.2  | 2   | 0.00 | 2.00 |       | 0.009           |
| 117.071         | C <sub>9</sub> H <sub>8</sub>                   | 116.063         | 0.62  | 6   | 0.00 | 0.89 | 7.60  | 0.152           |
| 117.102         | C <sub>5</sub> H <sub>12</sub> N <sub>2</sub> O | 116.095         | -0.34 | 1   | 0.20 | 2.40 |       | 0.489           |
| 118.048         | C <sub>4</sub> H <sub>7</sub> NO <sub>3</sub>   | 117.043         | -1.47 | 2   | 0.75 | 1.75 | 3.88  | 0.014           |
| 118.074         | C <sub>9</sub> H <sub>9</sub>                   | 117.070         | -3.6  | 5.5 | 0.00 | 1.00 | 7.60  | 0.015           |
| 118.105         | C <sub>6</sub> H <sub>13</sub> O <sub>2</sub>   | 117.092         | 5.67  | 0.5 | 0.33 | 2.17 | 5.93  | 0.027           |
| 118.904         | N/A                                             |                 |       |     | 0.00 | 0.00 |       | 0.160           |

| Exp. Mass [M+H] | Molecular Formula                                           | Theor. Mass [M] | mDa   | DU | O:C  | H:C  | Csat  | Ave Conc. (ppb) |
|-----------------|-------------------------------------------------------------|-----------------|-------|----|------|------|-------|-----------------|
| 119.035         | C <sub>4</sub> H <sub>6</sub> O <sub>4</sub>                | 118.027         | 1.21  | 2  | 1.00 | 1.50 | 5.58  | 0.024           |
| 119.054         | C <sub>8</sub> H <sub>6</sub> O                             | 118.042         | 4.66  | 6  | 0.13 | 0.75 | 6.28  | 0.013           |
| 119.086         | C <sub>9</sub> H <sub>10</sub>                              | 118.078         | 0.17  | 5  | 0.00 | 1.11 | 7.60  | 0.054           |
| 119.951         | N/A                                                         |                 |       |    | 0.00 | 0.00 |       | 0.014           |
| 120.048         | C <sub>7</sub> H <sub>5</sub> NO                            | 119.037         | 3.51  | 6  | 0.14 | 0.71 | 6.45  | 0.011           |
| 120.089         | C <sub>5</sub> H <sub>13</sub> NS                           | 119.077         | 4.95  | 0  | 0.00 | 2.60 | 12.10 | 0.006           |
| 120.900         | N/A                                                         |                 |       |    | 0.00 | 0.00 |       | 0.047           |
| 121.065         | C <sub>8</sub> H <sub>8</sub> O                             | 120.058         | 0.41  | 5  | 0.13 | 1.00 | 6.28  | 0.089           |
| 121.102         | C <sub>9</sub> H <sub>12</sub>                              | 120.094         | 0.52  | 4  | 0.00 | 1.33 | 7.60  | 0.015           |
| 121.952         | N/A                                                         |                 |       |    | 0.00 | 0.00 |       | 0.012           |
| 121.982         | N/A                                                         |                 |       |    | 0.00 | 0.00 |       | 0.009           |
| 122.031         | C <sub>3</sub> H <sub>7</sub> NO <sub>2</sub> S             | 121.020         | 3.47  | 1  | 0.67 | 2.33 | 5.45  | 0.012           |
| 122.068         | C <sub>4</sub> H <sub>11</sub> NOS                          | 121.056         | 4.09  | 0  | 0.25 | 2.75 | 7.88  | 0.008           |
| 123.045         | C <sub>7</sub> H <sub>6</sub> O <sub>2</sub>                | 122.037         | 0.44  | 5  | 0.29 | 0.86 | 5.35  | 0.017           |
| 123.117         | C <sub>9</sub> H <sub>14</sub>                              | 122.110         | 0.17  | 3  | 0.00 | 1.56 | 7.60  | 0.017           |
| 123.946         | N/A                                                         |                 |       |    | 0.00 | 0.00 |       | 0.083           |
| 123.974         | N/A                                                         |                 |       |    | 0.00 | 0.00 |       | 0.016           |
| 124.044         | C <sub>6</sub> H <sub>5</sub> NO <sub>2</sub>               | 123.032         | 4.5   | 5  | 0.33 | 0.83 | 4.57  | 0.007           |
| 124.960         | N <sub>2</sub> O <sub>4</sub> S                             | 123.958         | -4.95 | 2  | 0.00 | 0.00 | 7.28  | 0.012           |
| 124.981         | CH <sub>4</sub> N <sub>2</sub> OS <sub>2</sub>              | 123.977         | -2.68 | 1  | 1.00 | 4.00 | 6.95  | 0.013           |
| 125.060         | C <sub>7</sub> H <sub>8</sub> O <sub>2</sub>                | 124.052         | 0.19  | 4  | 0.29 | 1.14 | 5.35  | 0.024           |
| 125.096         | C <sub>8</sub> H <sub>12</sub> O                            | 124.089         | 0.01  | 3  | 0.13 | 1.50 | 6.28  | 0.024           |
| 125.960         | N/A                                                         |                 |       |    | 0.00 | 0.00 |       | 0.353           |
| 126.056         | C <sub>6</sub> H <sub>7</sub> NO <sub>2</sub>               | 125.048         | 0.75  | 4  | 0.33 | 1.17 | 4.57  | 0.005           |
| 126.092         | C <sub>7</sub> H <sub>11</sub> NO                           | 125.084         | 0.76  | 3  | 0.14 | 1.57 | 6.45  | 0.013           |
| 126.968         | CH <sub>2</sub> O <sub>5</sub> S                            | 125.962         | -1.47 | 1  | 5.00 | 2.00 | 8.90  | 0.161           |
| 127.035         | C <sub>6</sub> H <sub>6</sub> O <sub>3</sub>                | 126.032         | -3.87 | 4  | 0.50 | 1.00 | 4.83  | 0.013           |
| 127.047         | C <sub>5</sub> H <sub>6</sub> N <sub>2</sub> O <sub>2</sub> | 126.043         | -3.1  | 4  | 0.40 | 1.20 | 5.30  | 0.007           |
| 127.079         | C <sub>7</sub> H <sub>10</sub> O <sub>2</sub>               | 126.068         | 4.04  | 3  | 0.29 | 1.43 | 5.35  | 0.019           |
| 127.112         | C <sub>8</sub> H <sub>14</sub> O                            | 126.105         | -0.04 | 2  | 0.13 | 1.75 | 6.28  | 0.020           |
| 127.942         | N/A                                                         |                 |       |    | 0.00 | 0.00 |       | 0.013           |
| 127.966         | N/A                                                         |                 |       |    | 0.00 | 0.00 |       | 0.013           |
| 128.071         | C <sub>6</sub> H <sub>9</sub> NO <sub>2</sub>               | 127.063         | 0.2   | 3  | 0.33 | 1.50 | 4.57  | 0.013           |
| 128.108         | C <sub>7</sub> H <sub>13</sub> NO                           | 127.100         | 0.91  | 2  | 0.14 | 1.86 | 6.45  | 0.017           |
| 129.039         | C <sub>6</sub> H <sub>8</sub> OS                            | 128.030         | 1.84  | 3  | 0.17 | 1.33 | 7.28  | 0.009           |
| 129.060         | C <sub>6</sub> H <sub>8</sub> O <sub>3</sub>                | 128.047         | 5.28  | 3  | 0.50 | 1.33 | 4.83  | 0.017           |
| 129.092         | C <sub>7</sub> H <sub>12</sub> O <sub>2</sub>               | 128.084         | 1.29  | 2  | 0.29 | 1.71 | 5.35  | 0.036           |
| 129.126         | C <sub>8</sub> H <sub>16</sub> O                            | 128.120         | -1.09 | 1  | 0.13 | 2.00 | 6.28  | 0.015           |
| 130.054         | C <sub>5</sub> H <sub>7</sub> NO <sub>3</sub>               | 129.043         | 4.03  | 3  | 0.60 | 1.40 | 3.40  | 0.018           |
| 130.123         | C <sub>7</sub> H <sub>15</sub> NO                           | 129.115         | 0.56  | 1  | 0.14 | 2.14 | 6.45  | 0.009           |
| 131.036         | C <sub>5</sub> H <sub>6</sub> O <sub>4</sub>                | 130.027         | 2.31  | 3  | 0.80 | 1.20 | 4.70  | 0.025           |

| Exp. Mass<br>[M+H] | Molecular<br>Formula                                         | Theor.<br>Mass [M] | mDa   | DU  | O:C  | H:C  | Csat  | Ave Conc.<br>(ppb) |
|--------------------|--------------------------------------------------------------|--------------------|-------|-----|------|------|-------|--------------------|
| 133.080            | C <sub>6</sub> H <sub>12</sub> O <sub>3</sub>                | 132.079            | -5.52 | 1   | 0.50 | 2.00 | 4.83  | 0.035              |
| 136.023            | C <sub>3</sub> H <sub>5</sub> NO <sub>5</sub>                | 135.017            | -1.45 | 2   | 1.67 | 1.67 | 3.23  | 0.338              |
| 136.945            | N/A                                                          |                    |       |     | 0.00 | 0.00 |       | 0.006              |
| 137.025            | C <sub>7</sub> H <sub>4</sub> O <sub>3</sub>                 | 136.016            | 1.58  | 6   | 0.43 | 0.57 | 4.17  | 0.021              |
| 137.133            | C <sub>10</sub> H <sub>16</sub>                              | 136.125            | 0.12  | 3   | 0.00 | 1.60 | 7.13  | 0.137              |
| 138.020            | C <sub>6</sub> H <sub>3</sub> NO <sub>3</sub>                | 137.011            | 0.93  | 6   | 0.50 | 0.50 | 2.93  | 0.017              |
| 138.136            | C <sub>10</sub> H <sub>17</sub>                              | 137.133            | -4    | 2.5 | 0.00 | 1.70 | 7.13  | 0.016              |
| 139.038            | C <sub>7</sub> H <sub>6</sub> O <sub>3</sub>                 | 138.032            | -1.37 | 5   | 0.43 | 0.86 | 4.17  | 0.013              |
| 139.075            | C <sub>8</sub> H <sub>10</sub> O <sub>2</sub>                | 138.068            | -0.66 | 4   | 0.25 | 1.25 | 4.80  | 0.023              |
| 139.112            | C <sub>9</sub> H <sub>14</sub> O                             | 138.105            | 0.56  | 3   | 0.11 | 1.56 | 5.78  | 0.093              |
| 141.057            | C <sub>7</sub> H <sub>8</sub> O <sub>3</sub>                 | 140.047            | 2.68  | 4   | 0.43 | 1.14 | 4.17  | 0.017              |
| 141.127            | C <sub>9</sub> H <sub>16</sub> O                             | 140.120            | -0.89 | 2   | 0.11 | 1.78 | 5.78  | 0.034              |
| 143.072            | C <sub>7</sub> H <sub>10</sub> O <sub>3</sub>                | 142.063            | 1.83  | 3   | 0.43 | 1.43 | 4.17  | 0.009              |
| 143.105            | C <sub>8</sub> H <sub>14</sub> O <sub>2</sub>                | 142.099            | -1.76 | 2   | 0.25 | 1.75 | 4.80  | 0.019              |
| 143.143            | C <sub>9</sub> H <sub>18</sub> O                             | 142.136            | -0.34 | 1   | 0.11 | 2.00 | 5.78  | 0.023              |
| 145.053            | C <sub>6</sub> H <sub>8</sub> O <sub>4</sub>                 | 144.042            | 3.46  | 3   | 0.67 | 1.33 | 3.91  | 0.012              |
| 145.133            | C <sub>7</sub> H <sub>16</sub> N <sub>2</sub> O              | 144.126            | -0.14 | 1   | 0.14 | 2.29 | 10.85 | 0.439              |
| 146.136            | N/A                                                          |                    |       |     | 0.00 | 0.00 |       | 0.034              |
| 151.106            | C <sub>10</sub> H <sub>14</sub> O                            | 150.105            | -6.04 | 4   | 0.10 | 1.40 | 5.29  | 0.013              |
| 153.054            | C <sub>8</sub> H <sub>8</sub> O <sub>3</sub>                 | 152.047            | -0.42 | 5   | 0.38 | 1.00 | 3.55  | 0.022              |
| 153.091            | C <sub>9</sub> H <sub>12</sub> O <sub>2</sub>                | 152.084            | -0.51 | 4   | 0.22 | 1.33 | 4.25  | 0.010              |
| 153.128            | C <sub>10</sub> H <sub>16</sub> O                            | 152.120            | 0.21  | 3   | 0.10 | 1.60 | 5.29  | 0.021              |
| 155.105            | C <sub>9</sub> H <sub>14</sub> O <sub>2</sub>                | 154.099            | -1.76 | 3   | 0.22 | 1.56 | 4.25  | 0.012              |
| 155.144            | C <sub>10</sub> H <sub>18</sub> O                            | 154.136            | 0.86  | 2   | 0.10 | 1.80 | 5.29  | 0.010              |
| 156.102            | C <sub>8</sub> H <sub>13</sub> NO <sub>2</sub>               | 155.095            | 0.09  | 3   | 0.25 | 1.63 | 3.72  | 0.020              |
| 157.121            | C <sub>9</sub> H <sub>16</sub> O <sub>2</sub>                | 156.115            | -1.51 | 2   | 0.22 | 1.78 | 4.25  | 0.005              |
| 159.114            | C <sub>7</sub> H <sub>14</sub> N <sub>2</sub> O <sub>2</sub> | 158.106            | 0.7   | 2   | 0.29 | 2.00 | 4.35  | 0.450              |
| 160.116            | C <sub>11</sub> H <sub>13</sub> N                            | 159.105            | 4.22  | 6   | 0.00 | 1.18 | 7.23  | 0.035              |
| 161.131            | C <sub>12</sub> H <sub>16</sub>                              | 160.125            | -1.08 | 5   | 0.00 | 1.33 | 6.18  | 0.007              |
| 163.119            | C <sub>10</sub> H <sub>14</sub> N <sub>2</sub>               | 162.116            | -3.87 | 5   | 0.00 | 1.40 | 12.33 | 0.009              |
| 179.066            | C <sub>10</sub> H <sub>10</sub> O <sub>3</sub>               | 178.063            | -4.47 | 6   | 0.30 | 1.00 | 2.37  | 0.021              |
| 187.144            | C <sub>14</sub> H <sub>18</sub>                              | 186.141            | -4.03 | 6   | 0.00 | 1.29 | 5.23  | 0.007              |
| 192.138            | C <sub>12</sub> H <sub>17</sub> NO                           | 191.131            | 0.11  | 5   | 0.08 | 1.42 | 4.08  | 0.031              |
| 230.175            | C <sub>12</sub> H <sub>23</sub> NO <sub>3</sub>              | 229.168            | 0.23  | 2   | 0.25 | 1.92 | 0.07  | 0.048              |
